# Supplementary material
Source: ML conference proceedings conference paper supplement (https://openreview.net/forum?id=7su2GfqvmN)
Supplement: supplementary_material [file attachment]

# Supplementary Videos README

This repository contains supplementary videos that provide additional results and dataset examples.

## Video List

### Video 1: Additional Results

- **Filename:** `additional_results.mp4`
- **Description:** This video presents additional results visually. From left to right, the column displays the input images, estimated occupancy field, ID field, contact field, and ground truth geometry.

### Video 2: Two-Person Dataset Example

- **Filename:** `two_person_data_example.mp4`
- **Description:** This video showcases a dataset example of two people performing a dancing motion. From left to right, the column shows the front view of the RGB images, the front view of the mask images, the front view of the instance mask images, the front view of the normal map, and the 3D geometry.

### Video 3: Three-Person Dataset Example

- **Filename:** `three_person_data_example.mp4`
- **Description:** This video provides a dataset example of three people engaged in talking and drinking motions. From left to right, the column displays the front view of the RGB images, the front view of the mask images, the front view of the instance mask images, the front view of the normal map, and the 3D geometry.

### Video 4: Four-Person Dataset Example

- **Filename:** `four_person_data_example.mp4`
- **Description:** This video features a dataset example of a man playing guitar surrounded by three people. From left to right, the column shows the front view of the RGB images, the front view of the mask images, the front view of the instance mask images, the front view of the normal map, and the 3D geometry.
